# Supplementary material for: Anhaltende Fatigue als Folge einer COVID-19-Infektion bei Beschäftigten im Gesundheitswesen: Risikofaktoren und Auswirkungen auf die Lebensqualität
Source: Springer Nature journal article supplement (doi:10.1007/s00103-022-03511-4), 2022-03-17
Supplement: MOESM1 [file 20228264]

Onlinematerial zum Beitrag:

## **Anhaltende Fatigue als Folge einer COVID-19-Infektion bei Beschäftigten im Gesundheitswesen: Risikofaktoren und Auswirkungen auf die Lebensqualität**

Julia Haller<sup>1\*</sup>, Rüya-Daniela Kocalevent<sup>2</sup>, Albert Nienhaus<sup>3</sup>, Claudia Peters<sup>3</sup>, Corinna Bergelt<sup>4\*\*</sup>, Uwe Koch-Gromus<sup>1\*\*</sup>

<sup>1</sup> Universitätsklinikum Hamburg-Eppendorf, Institut und Poliklinik für Medizinische Psychologie, Hamburg, Deutschland

<sup>2</sup> Universitätsklinikum Hamburg-Eppendorf, Institut und Poliklinik für Allgemeinmedizin, Hamburg, Deutschland

<sup>3</sup> Universitätsklinikum Hamburg-Eppendorf, Institut für Versorgungsforschung in der Dermatologie und bei Pflegeberufen (IVDP), Hamburg, Deutschland

<sup>4</sup> Universitätsmedizin Greifswald, Institut für Medizinische Psychologie, Greifswald, Deutschland

\*Korrespondierende Autorin

\*\*geteilte Letztautorenschaft (beide Autor:innen haben gleichermaßen zum Manuskript beigetragen)

### **Korrespondenzadresse:**

Julia Haller-Wolf  
Universitätsklinikum Hamburg-Eppendorf  
Institut und Poliklinik für Medizinische Psychologie  
Martinistraße 52  
20246 Hamburg  
Deutschland  
[j.haller-wolf@uke.de](mailto:j.haller-wolf@uke.de)

Inhalt:

**Tabelle:** Vergleich der Versicherten der Berufsgenossenschaft für Gesundheitsdienst und Wohlfahrtspflege (BGW), die 2020 mit SARS-CoV-2 infiziert waren, unterteilt in drei Teilgruppen: von schwerer Long-/Post-COVID-19-Fatigue Betroffene (LoPoCoFatigue); von leichter Fatigue Betroffene (LoPoCo-Sonstige) bzw. nicht von Fatigue Betroffene (non-LoPoCo) mittels multivariater Varianzanalyse

**Vergleich der Versicherten der Berufsgenossenschaft für Gesundheitsdienst und Wohlfahrtspflege (BGW), die 2020 mit SARS-CoV-2 infiziert waren, unterteilt in drei Teilgruppen: von schwerer Long-/Post-COVID-19-(LoPoCo-)Fatigue Betroffene (LoPoCoFatigue); von leichter LoPoCo-Fatigue Betroffene (LoPoCo-Sonstige) bzw. nicht von LoPoCo-Fatigue Betroffene (non-LoPoCo) mittels multivariater Varianzanalyse**

|                                              | <i>df1</i> | <i>df2</i> | <i>F</i> | <i>p</i> | $\eta^2_{part}$ |
|----------------------------------------------|------------|------------|----------|----------|-----------------|
| Alter                                        | 2          | 1937       | 3.52     | 0,030    | 0,004           |
| Body-Mass-Index (BMI)                        | 2          | 1937       | 3.87     | 0,021    | 0,004           |
| subjektiver Gesundheitszustand vor COVID-19  | 2          | 1937       | 13.26    | <0,001   | 0,011           |
| subjektiver Gesundheitszustand nach COVID-19 | 2          | 1937       | 348.55   | <0,001   | 0,331           |
| Anzahl der Akutsymptome                      | 2          | 1937       | 68.25    | <0,001   | 0,152           |
| PHQ-4                                        | 2          | 1937       | 142.79   | <0,001   | 0,099           |
| Psychische Summenskala VR-12                 | 2          | 1937       | 215.66   | <0,001   | 0,279           |
| Körperliche Summenskala VR-12                | 2          | 1937       | 133.33   | <0,001   | 0,150           |

*Anmerkung:* Aufgrund fehlender Werte in einer oder mehreren untersuchten Variablen wurden  $n= 98$  Teilnehmende aus der Analyse ausgeschlossen, sodass aus der Teilstichprobe LoPoCo-Fatigue  $n= 197$ , aus der Teilstichprobe LoPoCo-Sonstige  $n= 1.505$  und aus der Teilstichprobe non-LoPoCo  $n= 235$  Teilnehmende in die Analyse eingeschlossen wurden.

PHQ-4 = Patient Health Questionnaire for Depression and Anxiety-4, VR-12= Veterans RAND 12-Item Health Survey
